# Supplementary material
Source: publisher site journal article supplement (https://www.spandidos-publications.com/6239/downloadSupplementary)
Supplement: Supplementary file 1 [file downloadSupplementary]

## Sheet: Sheet1
Table SV. Multivariate Cox analysis of 7 glycolysis-related lncRNAs associated with OS.
ID	coefficient	HR	HR.95L	HR.95H	P-value
CRNDE	0.530754	2.28645	1.84369	2.83555	5.04e-14
AC022034.1	0.515972	3.06064	2.21019	4.23833	1.64e-11
RHOQ-AS1	4.007	29.0364	7.45242	113.132	1.21e-06
AL159169.2	-1.3359	0.407119	0.242035	0.684801	0.000706597
AL133215.2	0.902923	5.41391	2.48509	11.7946	2.13e-05
AC007098.1	0.660037	4.99737	3.22287	7.74892	6.52e-13
LINC02587	0.297556	1.93082	1.62776	2.29032	4.27e-14
HR, hazard ratio; OS, overall survival.
